# Supplementary material
Source: Elsevier journal article supplement (https://www.sciencedirect.com/science/article/pii/S1695403320305294)
Supplement: mmc1 [file S1695403320305294:mmc1.docx]

**Anexos**

**Tabla 1**

|  | **Paciente 1** | **Paciente 2** | **Paciente 3** | **Paciente 4** | **Paciente 5** | **Paciente 6** | **Paciente 7** | **Paciente 8** |
| --- | --- | --- | --- | --- | --- | --- | --- | --- |
|  | **Descripción de los pacientes** | | | | | | | |
| **Sexo** | Varón | Mujer | Mujer | Mujer | Varón | Mujer | Mujer | Varón |
| **Edad al debut (años)** | 2,2 | 3,1 | 2 | 2,4 | 2,3 | 4,9 | 3,2 | 2,9 |
| **Biopsia renal** | Cambios mínimos | No realizada | Cambios mínimos | Cambios mínimos | No realizada | GESF | No realizada | Nefropatía IgM |
| **Año inicio RTX 1** | 2015 | 2017 | 2013 | 2012 | 2013 | 2017 | 2018 | 2010 |
| **Edad al inicio RTX (años)** | 17 | 12,9 | 5 | 9,1 | 15,5 | 9,2 | 13 | 14,3 |
| **Evolución SN (años)** | 14,8 | 9,7 | 2,9 | 7,6 | 13,2 | 4,2 | 9,5 | 11,4 |
| **ClCr 2 (ml/min/1,73 m²)** | 168,2 | 183,3 | 175,9 | 129,5 | 87,8 | 126,3 | 159,3 | 168,3 |
|  | **Estado previo al inicio del tratamiento con RTX** | | | | | | | |
| **Recaídas el año previo** | 2 | 2 | 5 | 6 | 6 | 2 | 4 | 2 |
| **IS previos al RTX 3** | Corticoides, CsA, MMF, FK, CFM | Corticoides, CsA, MMF | Corticoides, CsA, MMF, CFM, Levamisol | Corticoides, CsA, MMF, FK, CFM | Corticoides, CsA, MMF | Corticoides, CsA | Corticoides, CsA, MMF | Corticoides, CsA, MMF, CFM |
| **Dosis IS los 3 meses previos al RTX 4** | Corticoides: 8,88  FK: 0,16 | Corticoides: 9,80  MMF: 987,00 | Corticoides: 43,38  CsA: 4,57 | Corticoides: 34,50  FK: 0,05 | Corticoides: 20,60  MMF: 480,18 | Corticoides: 18,47  CsA: 4,57 | Corticoides: 38,80  MMF:1036,00 | Corticoides: 53,27  MMF: 980,00 |

1 RTX: rituximab. 2 ClCr: aclaramiento de creatinina. 3 IS: inmunosupresores. CsA: ciclosporina A. MMF: micofenolato de mofetilo. FK: tacrolimus. CFM: ciclofosfamida. 4 Corticoides: mg/m²/día. FK: mg/kg/día. MMF: mg/m2/día. CsA: mg/kg/día.

**Tabla 2**

1 RTX: rituximab. 2 MMF: micofenolato de mofetilo. 3 LB: linfocitos B. 4 IS: inmunosupresores. Corticoides: mg/m²/día.

|  | **Paciente 1** | **Paciente 2** | **Paciente 3** | **Paciente 4** | **Paciente 5** | **Paciente 6** | **Paciente 7** | **Paciente 8** |
| --- | --- | --- | --- | --- | --- | --- | --- | --- |
|  | **Características del tratamiento** | | | | | | | |
| **Efectos secundarios** | No | No | No | Crisis broncobstructiva leve | No | No | Exantema facial, crisis broncobstructiva leve | Exantema facial |
| **Ciclos RTX 1 (dosis por ciclo)** | 3 (2/2/2) | 2 (2/1) | 2 (2/2) | 7 (2/2/2/2/1/1/1) | 1 (2) | 2 (2/2) | 1 (1) | 2 (4/3) |
| **Dosis total RTX (mg/m²)** | 2250 | 1125 | 1500 | 4125 | 750 | 1500 | 375 | 2625 |
| **MMF 2 tras 3 primeros meses** | No | No | Sí | Sí | Sí | No | No | Sí |
| **Dosis adicionales RTX sin recaída** | No | No | No | No | No | No | No | No |
|  | **Respuesta al tratamiento** | | | | | | | |
| **LB 3 tras primera dosis RTX (%)** |  |  |  | 0,2 |  |  |  | 1 |
| **Tiempo reconstitución LB (meses)** | 13 | 8 | 12 | 6,5 | 16 | 7,4 | Aún 0% | 10,3 |
| **Primera recaída postRTX (meses)** | 12 | 10 | 20 | 16 | No recaída | 15 | No recaída | 43 |
| **Tiempo retirada corticoides tras inicio RTX (meses)** | 1 | 0,9 | 0,7 | 2 | 2,4 | 0,6 | 0,2 | 3 |
|  | **Estado actual de los pacientes** | | | | | | | |
| **Seguimiento (meses)** | 40 | 12 | 53 | 69 | 56 | 18 | 5 | 97 |
| **Complicaciones** | No | No | No | No | No | No | No | No |
| **Dosis IS 3 últimos meses 4** | 0 | 0 | Corticoides: 2,02 | Corticoides: 2,96 | 0 | Corticoides: 2,60 | 0 | Corticoides: 0,56 |
| **% reducción IS** | 100 | 100 | Corticoides: 95,3  CsA: 100 | Corticoides: 91,5  FK: 100 | 100 | Corticoides: 85,9  CsA: 100 | 100 | Corticoides: 98,9  MMF: 100 |
| **Corticoides última visita 4** | 0 | 0 | 2,02 | 44,40 (recaída) | 0 | 11,70 | 0 | 0,56 |
